# Supplementary material
Source: HighWire-hosted journal article supplement (https://www.jneurosci.org/highwire/filestream/598439/field_highwire_adjunct_files/0/Figure_1.pdf)
Supplement: Figure_1.pdf [file Figure_1.pdf]

Supplementary Fig.1

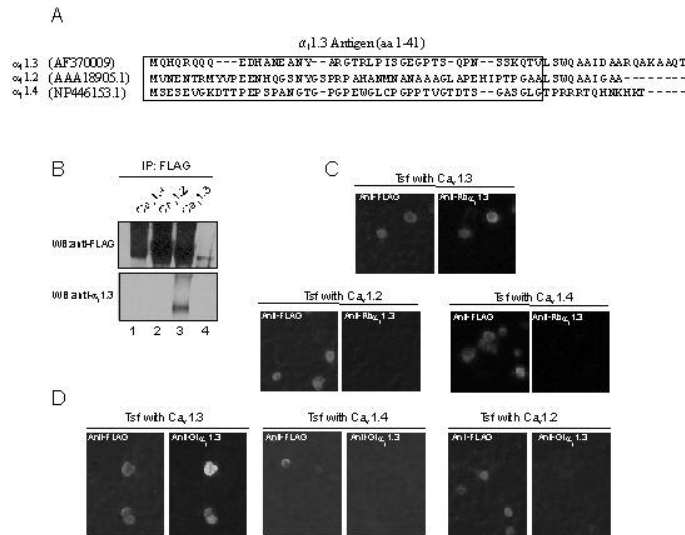

**$\alpha_1.3$  antibodies recognize  $\alpha_1.3$  but not other L-type channel  $\alpha_1$  subunits.**

(A) The rabbit  $\alpha_1.3$  antibody (Anti-Rb $\alpha_1.3$ ) was targeted against an epitope in the cytoplasmic N-terminal domain of  $\alpha_1.3$  (amino acids 1-41) that is poorly conserved in other L-type channel  $\alpha_1$  subunits. (B) Cells were transfected with Ca<sub>v</sub>1.4 ( $\alpha_1.4$ -FLAG,  $\beta_{1b}$ ,  $\alpha_2\delta$ ; lane 1), Ca<sub>v</sub>1.2 ( $\alpha_1.2$ -FLAG,  $\beta_{1b}$ ,  $\alpha_2\delta$ ; lane 2), or Ca<sub>v</sub>1.3 ( $\alpha_1.3$ -FLAG,  $\beta_{1b}$ ,  $\alpha_2\delta$ ; lane 3) and subject to lysis and immunoprecipitation using anti-FLAG antibodies. Immunoprecipitated proteins were detected by Western blotting with antibodies recognizing FLAG- (top blot) or  $\alpha_1.3$  (bottom blot). Of the FLAG-immunoprecipitated  $\alpha_1$  subunits (top), the  $\alpha_1.3$  antibody detected only  $\alpha_1.3$  (bottom). (C) HEK293T cells were transfected Ca<sub>v</sub>1.3 ( $\alpha_1.3$ -FLAG,  $\beta_{1b}$ ,  $\alpha_2\delta$ ; top), with Ca<sub>v</sub>1.2 ( $\alpha_1.2$ -FLAG,  $\beta_{1b}$ ,  $\alpha_2\delta$ ; bottom) or Ca<sub>v</sub>1.4 ( $\alpha_1.4$ -FLAG,  $\beta_{1b}$ ,  $\alpha_2\delta$ ; bottom) and immunolabeled with anti-Rb $\alpha_1.3$  (right) or anti-FLAG (left) antibodies and FITC or rhodamine-labeled secondary antibodies. Although FLAG-labeling (left) confirmed expression of Ca<sub>v</sub>1.2, Ca<sub>v</sub>1.4, Ca<sub>v</sub>1.3, Rb $\alpha_1.3$  staining was only observed in cell transfected with Ca<sub>v</sub>1.3 (top right). (D) The goat  $\alpha_1.3$  antibody (Anti-Gt $\alpha_1.3$ ) was targeted against an epitope in the cytoplasmic N-terminal domain of  $\alpha_1.3$  (aa 24-37) and a cytoplasmic loop linking domains II and III of  $\alpha_1.3$  (aa 810-827). HEK293T cells were transfected with Ca<sub>v</sub>1.3 ( $\alpha_1.3$ -FLAG,  $\beta_{1b}$ ,  $\alpha_2\delta$ ; left), Ca<sub>v</sub>1.4 ( $\alpha_1.4$ -FLAG,  $\beta_{1b}$ ,  $\alpha_2\delta$ ; center), or Ca<sub>v</sub>1.2 ( $\alpha_1.2$ -FLAG,  $\beta_{1b}$ ,  $\alpha_2\delta$ ; far right) and immunolabeled with anti-Gt $\alpha_1.3$  (right panel) or anti-FLAG (left panel) antibodies and FITC or rhodamine-labeled secondary antibodies. Although FLAG-labeling (left) confirmed expression of Ca<sub>v</sub>1.3, Ca<sub>v</sub>1.4 and Ca<sub>v</sub>1.2, staining with Gt $\alpha_1.3$  was only observed in cell transfected with Ca<sub>v</sub>1.3 (left, right panel).
